# Supplementary material
Source: MDPI journal article supplement (https://www.mdpi.com/2073-445X/10/2/212)
Supplement: s1 [file s1]

## Supplementary Materials

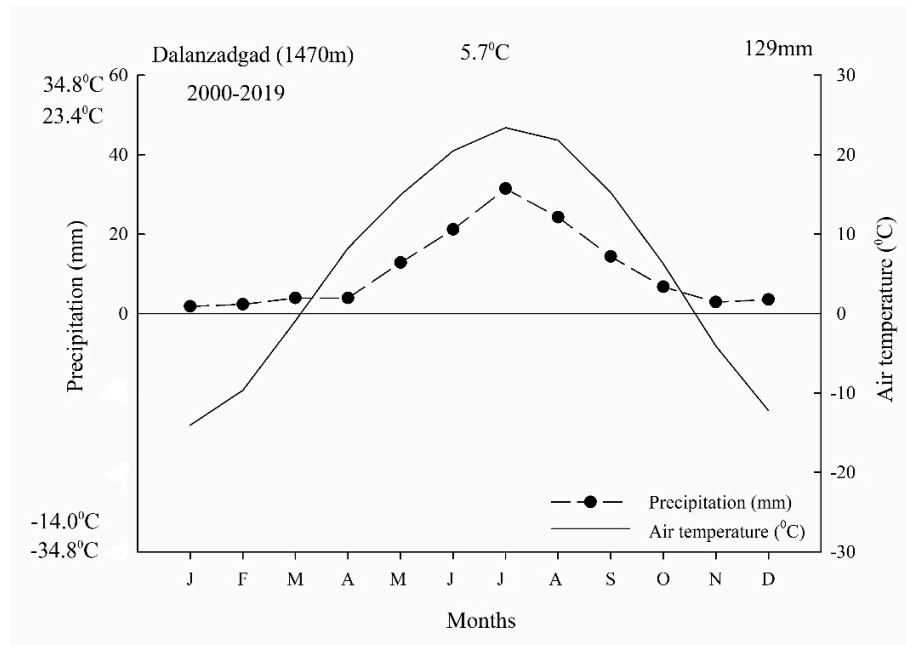

**Figure S1.** Mean annual temperature (solid line) and rainfall (broken, dotted line) in the experimental site obtained from the period of January – December (2000-2019).

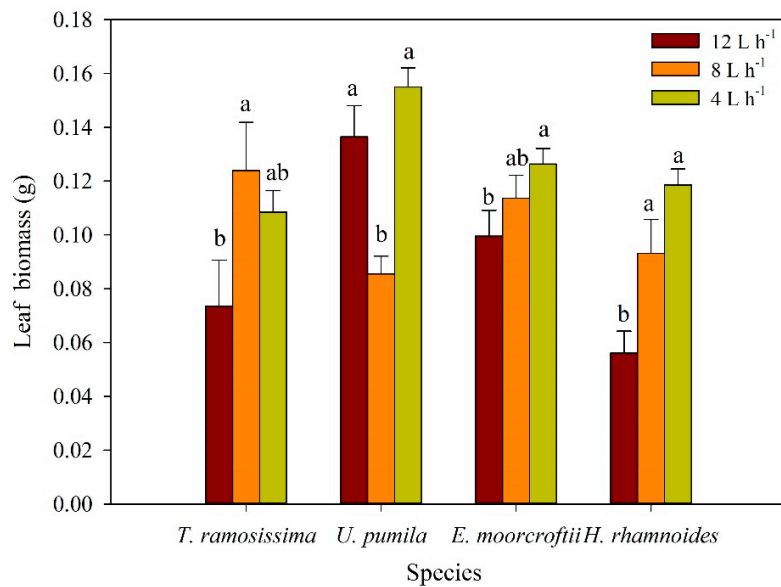

**Figure S2.** Leaf biomass (LB) of *Tamarix ramosissima*, *Ulmus pumila*, *Elaeagnus moorcroftii* and *Hippophae rhamnoides* across different irrigation treatments.

**Table S1**

P values estimated by two-way analysis of variance (ANOVA) for RCD and height growth across treatments and species. P value in bold font indicates non-significant at  $\alpha = 0.05$ .

| Source            | DF | Height  |               | Root collar diameter |        |
|-------------------|----|---------|---------------|----------------------|--------|
|                   |    | F Value | Pr>F          | F Value              | Pr>F   |
| Species           | 3  | 26.21   | <0.0001       | 73.50                | <.0001 |
| Treatment         | 2  | 13.82   | <0.0001       | 13.60                | <.0001 |
| Treatment*Species | 6  | 1.68    | <b>0.1245</b> | 3.97                 | 0.0007 |

**Table S2**

Repeated measures analysis of variance for transformed heights and RCD from all measurement dates, showing sources of variance, degrees of freedom for numerator (DF) and F ratios (F value) and their probabilities (Pr) per species. P value in bold font indicates non-significant at  $\alpha = 0.05$ .

| Source                            | DF | Height  |               | Root collar diameter |               |
|-----------------------------------|----|---------|---------------|----------------------|---------------|
|                                   |    | F Value | Pr>F          | F Value              | Pr>F          |
| <i>Tamarix ramosissima</i> Ledeb. | 2  | 2.71    | <b>0.0716</b> | 0.96                 | <b>0.3873</b> |
| <i>Ulmus pumila</i> L.            | 2  | 3.32    | 0.0401        | 1.20                 | <b>0.3042</b> |
| <i>Elaeagnus moorcroftii</i> L.   | 2  | 6.04    | 0.0034        | 2.70                 | <b>0.0722</b> |
| <i>Hippophae rhamnoides</i> L.    | 2  | 10.43   | <0.0001       | 15.14                | <0.0001       |
